# Supplementary material
Source: MDPI journal article supplement (https://www.mdpi.com/2073-4344/10/10/1118)
Supplement: s1 [file s1]

*Supporting information*

# **$\beta$ -cyclodextrin-silica hybrid: a spatially controllable anchoring strategy for Cu(II)/Cu(I) complex immobilization.**

**Federica Calsolaro,<sup>1</sup> Katia Martina,<sup>1\*</sup> Elisa Borfecchia,<sup>2</sup> Fernando Chávez-Rivas,<sup>2,3</sup> Giancarlo Cravotto,<sup>1</sup> and Gloria Berlier<sup>2\*</sup>**

<sup>1</sup> Dipartimento di Scienza e Tecnologia del Farmaco, University of Turin, Via Pietro Giuria 9, 10125 Turin, Italy

<sup>2</sup> Dipartimento di Chimica, University of Turin, Via Pietro Giuria 7, 10125 Turin, Italy

<sup>3</sup> Instituto Politécnico Nacional, ESFM, Departamento de Física, UPALM, Zacatenco, Ciudad de México 07738, Mexico

\* Correspondence: [gloria.berlier@unito.it](mailto:gloria.berlier@unito.it); [katia.martina@unito.it](mailto:katia.martina@unito.it)

## Table of contents

|                                                                         |    |
|-------------------------------------------------------------------------|----|
| 1. Materials and Methods .....                                          | 3  |
| 1.1. Materials.....                                                     | 3  |
| 1.2. Synthesis of 6 <sup>l</sup> -O-p-Toluenesulfonyl- $\beta$ -CD..... | 3  |
| 1.3. Catalyst preparation .....                                         | 3  |
| 1.3.1. Preparation of Si-Gly.....                                       | 3  |
| 1.3.2. Preparation of Si-MonoAm.....                                    | 3  |
| 1.3.3. Preparation of Si-TriAm .....                                    | 3  |
| 1.3.4. Preparation of Si-Gly-CD.....                                    | 3  |
| 1.3.5. Preparation of Si-MonoAm-CD.....                                 | 3  |
| 1.3.6. Preparation of Si-TriAm-CD .....                                 | 4  |
| 2. Thermogravimetric analyses .....                                     | 4  |
| 3. NMR characterization.....                                            | 4  |
| 4. References .....                                                     | 11 |

## 1. Materials and Methods

### 1.1. Materials

All commercially available reagents and solvents were purchased from Sigma-Aldrich (Milan, Italy) and used without further purification. SIPERNAT 320 amorphous silica was supplied by Evonik Degussa.  $\beta$ -CD was provided by Wacker Chemie (München, Germany). TLC Merck 60 F254 (0.25 mm) plates (Milan, Italy) were used to monitor CuAAC reactions. For GC-MS analyses a 30 m capillary column, i.d. of 0.25 mm and film thickness 0.25  $\mu$ m was used. GC conditions were: injection split 1:10, injector temperature 250 °C, detector temperature 280 °C. Gas carrier: helium (1.2 mL/min), temperature program: from 50 °C (5 min) to 100 °C (1 min) at 10 °C/min, to 230 °C (1 min) at 20 °C/min, to 300 °C (5 min) at 20 °C/min. Chemical shifts of NMR spectra were calibrated to the residual proton and carbon resonances of the solvent; CDCl<sub>3</sub> ( $\delta$ H = 7.26,  $\delta$ C = 77.16). Chemical shifts ( $\delta$ ) are given in ppm and coupling constants (J) in Hz.

### 1.2. Synthesis of 6<sup>I</sup>-O-*p*-Toluenesulfonyl- $\beta$ -CD

The synthesis of 6<sup>I</sup>-O-*p*-Toluenesulfonyl- $\beta$ -CD was performed following published synthetic procedure.[1] Briefly,  $\beta$ CD (1.3 g, 1.14 mmol) was dissolved in water (30 mL) and the solution was transferred to the cavitating-tube reactor. 1-(*p*-toluenesulfonyl)imidazole (1.01 g, 4.58 mmol) was added and the mixture was sonicated for 10 min (19.2 kHz, 20W). 2 mL of aqueous NaOH (560 mg, 14 mmol) were added dropwise and after 30 min the suspension was transferred to a flask and NH<sub>4</sub>Cl (1.67 g, 31.5 mmol) was added. After one night the mixture was filtered and washed with ice-cold water (5 mL) and acetone (5 mL). Finally the solid was dried under vacuum.

### 1.3. Catalyst preparation

#### 1.3.1. Preparation of Si-Gly

(3-Glycidyloxypropyl)trimethoxysilane (0.040 mL) was dissolved in toluene (1 mL) and silica (0.100 g) was added. The mixture was sonicated 2 h in US bath (Power 200 W, Frequency 80 kHz). The product was filtered and washed with toluene and chloroform. Finally, it was dried under vacuum at room temperature for 12 h.

#### 1.3.2. Preparation of Si-MonoAm

3-(Trimethoxysilyl)-propylamine (0.040 mL) was dissolved in toluene (1 mL) and silica (0.100 g) was added. The mixture was sonicated 2 h in US bath (Power 200 W, Frequency 80 kHz). The product was filtered and washed with toluene and chloroform. Finally, it was dried under vacuum at room temperature for 12 h.

#### 1.3.3. Preparation of Si-TriAm

N<sup>1</sup>-(3-Trimethoxysilylpropyl)diethylenetriamine (0.040 mL) was dissolved in toluene (1 mL) and silica (0.100 g) was added. The mixture was sonicated 2 h in US bath (Power 200 W, Frequency 80 kHz). The product was filtered and washed with toluene and chloroform. Finally, it was dried under vacuum at room temperature for 12 h.

#### 1.3.4. Preparation of Si-Gly-CD

6<sup>I</sup> amino-6<sup>I</sup>-deoxy- $\beta$ -CD (1 g, 0.88 mmol) was dissolved in DMF (15 mL). Si-Gly (1 g) was added. The suspension was irradiated under MW and US combined irradiation at 100 °C for 4 h (MW power 20 W, US power 35 W). The product was filtered and washed with water, methanol and chloroform. Finally, it was dried under vacuum at room temperature for 12 h.

#### 1.3.5. Preparation of Si-MonoAm-CD

6<sup>L</sup>-O-*p*-Toluenesulfonyl- $\beta$ -CD (1 g, 0.77 mmol) was dissolved in DMF (15 mL). Si-MonoAm (1 g) was added. The suspension was irradiated under MW and US combined irradiation at 100 °C for 4 h (MW power 20 W, US power 35 W). The product was filtered and washed with water, methanol and chloroform. Finally, it was dried under vacuum at room temperature for 12 h.

### 1.3.6. Preparation of Si-TriAm-CD

6<sup>L</sup>-O-*p*-Toluenesulfonyl- $\beta$ -CD (1 g, 0.77 mmol) was dissolved in DMF (15 mL). Si-TriAm (1 g) was added. The suspension was irradiated under MW and US combined irradiation at 100 °C for 4 h (MW power 20 W, US power 35 W). The product was filtered and washed with water, methanol and chloroform. Finally, it was dried under vacuum at room temperature for 12 h.

## 2. Thermogravimetric analyses

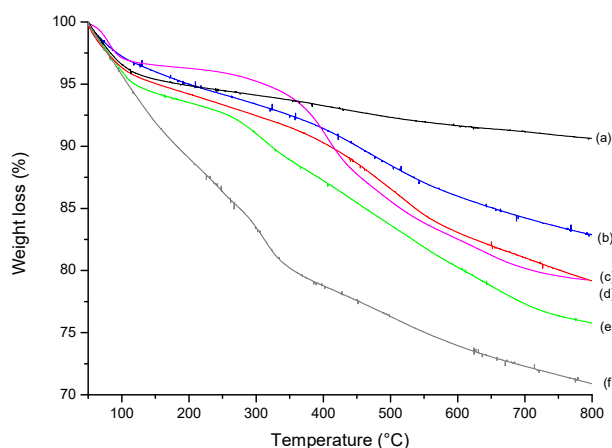

**Figure S1.** TGA profiles of organic inorganic silica derivatives, measured from 50 to 800 °C. On the left: (a) silica, (b) Si-Gly, (c) Si-MonoAm, (d) Si-TriAm, (e) Si-DiAm, (f) Si-DETA.

## 3. NMR characterization

### 1,5-bis(1-benzyl-1H-1,2,3-triazol-4-yl)pentane (1)

<sup>1</sup>H NMR (600 MHz, CDCl<sub>3</sub>):  $\delta$  7.39 – 7.31 (m, 6H), 7.24 (d, *J* = 6.4 Hz, 4H), 7.19 (s, 2H), 5.47 (s, 4H), 2.66 (s, 4H), 1.66 (s, 4H), 1.38 (s, 2H).

<sup>13</sup>C NMR (151 MHz, CDCl<sub>3</sub>):  $\delta$  135.26, 129.38, 128.95, 128.31, 54.40, 29.29, 28.96, 25.85.

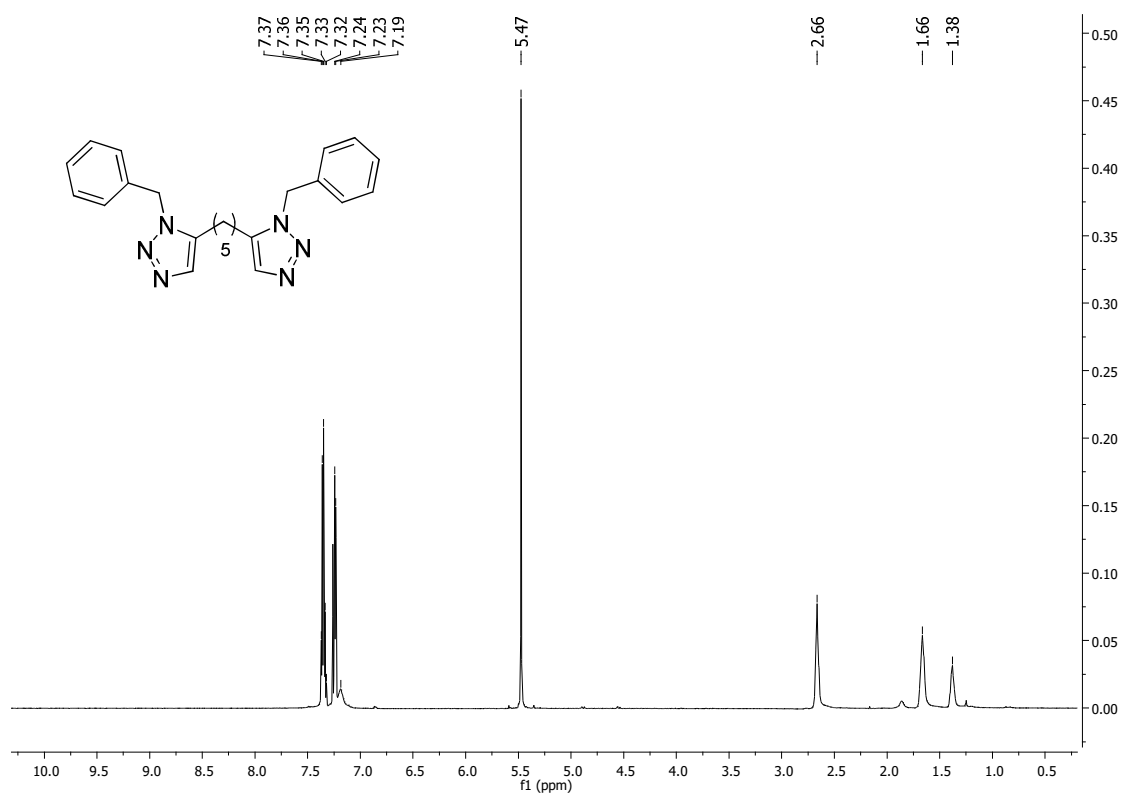

Figure S2. <sup>1</sup>H NMR of 1.

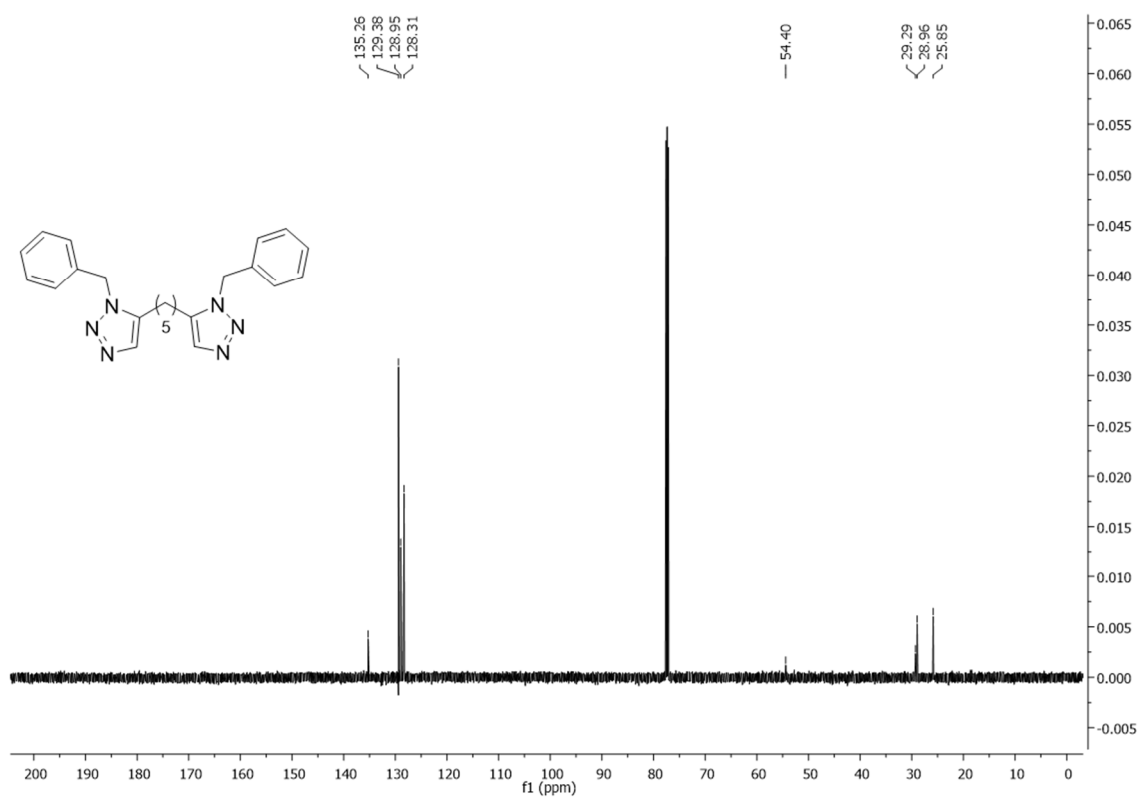

Figure S3. <sup>13</sup>C NMR of 1.

**1,6-bis(5-phenyl-1H-1,2,3-triazol-1-yl)hexane (2)**

$^1\text{H}$  NMR (600 MHz,  $\text{CDCl}_3$ ):  $\delta$  7.84 (d,  $J = 7.1$  Hz, 2H), 7.76 (s, 1H), 7.42 (t,  $J = 7.6$  Hz, 2H), 7.34 (t,  $J = 8.0$  Hz, 1H), 4.40 (t,  $J = 7.0$  Hz, 2H), 2.02 – 1.93 (m, 2H), 1.45 – 1.35 (m, 2H).

$^{13}\text{C}$  NMR (151 MHz,  $\text{CDCl}_3$ ):  $\delta$  130.51, 128.95, 128.27, 125.74, 120.23, 49.82, 29.84, 26.09.

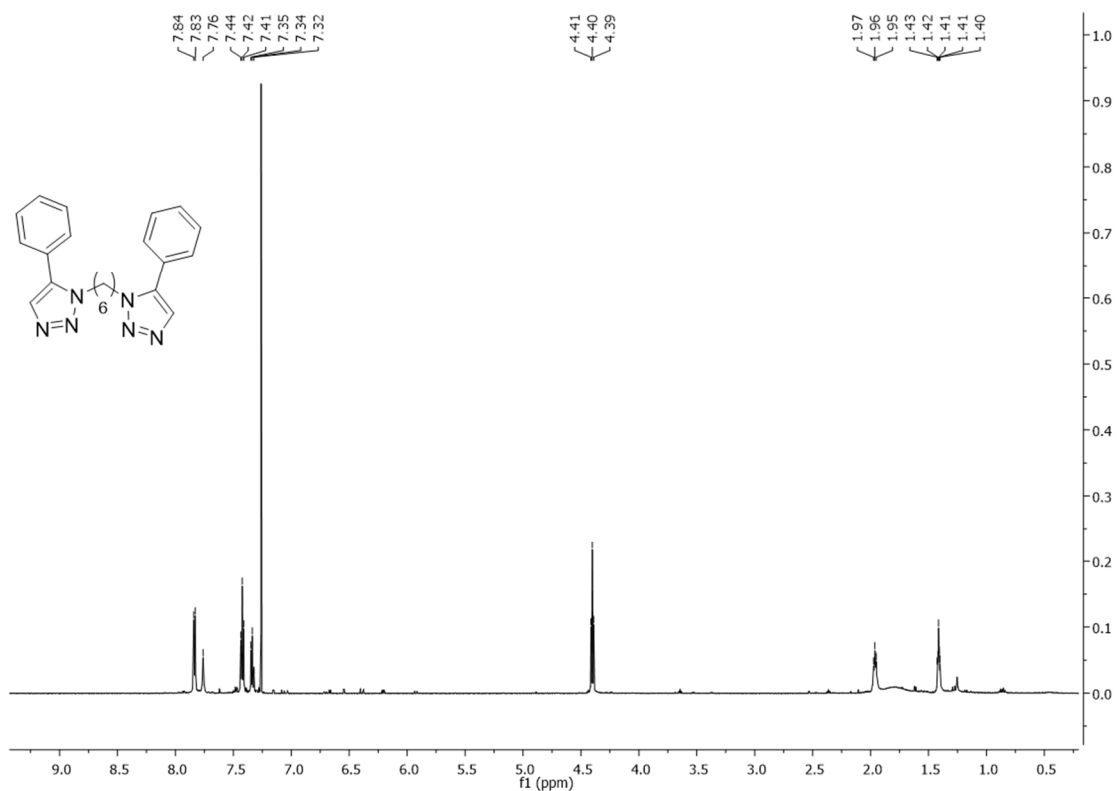

**Figure S4.**  $^1\text{H}$  NMR of **2**.

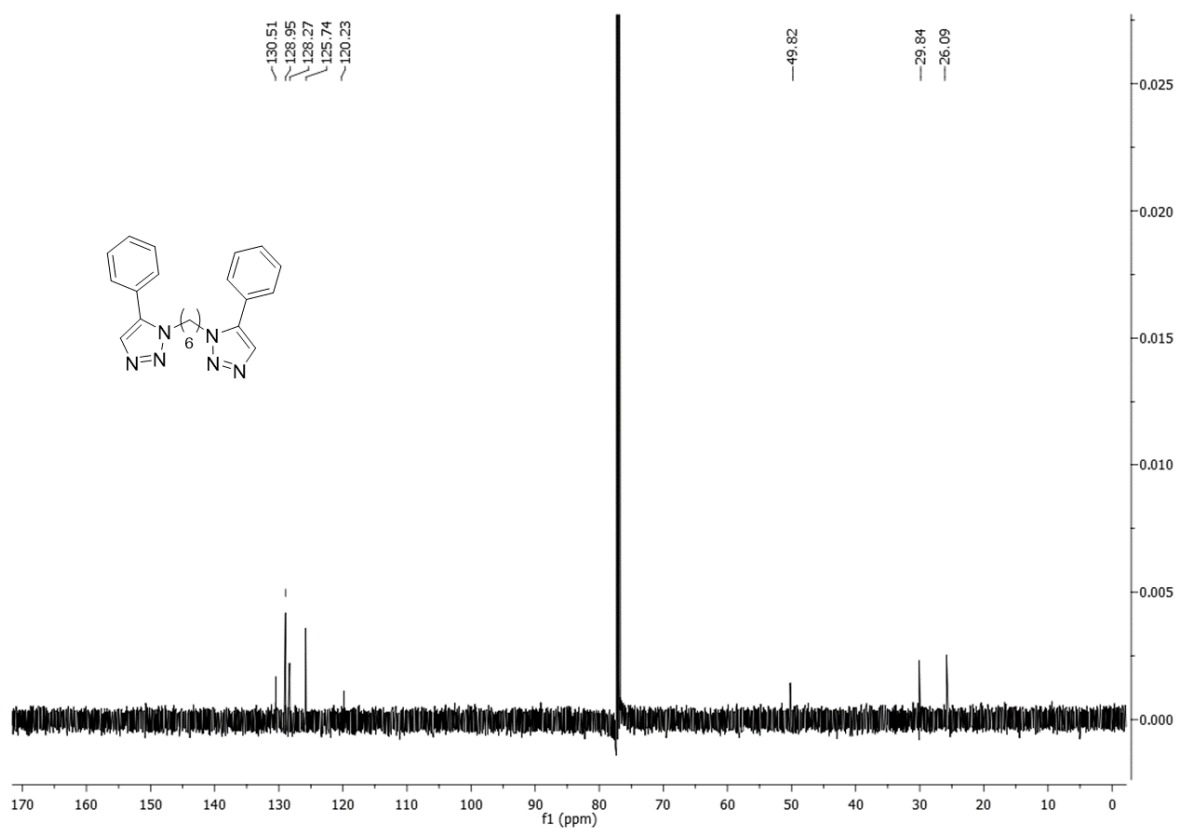

Figure S5. <sup>13</sup>C NMR of 2.

**2-(1-benzyl-1H-1,2,3-triazol-4-yl)ethan-1-ol (3)**

<sup>1</sup>H NMR (600 MHz, CDCl<sub>3</sub>): δ 7.39 – 7.32 (m, 4H), 7.26 (d, *J* = 1.6 Hz, 1H), 7.24 (d, *J* = 1.0 Hz, 1H), 5.48 (s, 2H), 4.10 (brs, 1H), 2.85 (s, 2H), 2.19 (s, 2H).

<sup>13</sup>C NMR (151 MHz, CDCl<sub>3</sub>): δ 145.73, 134.91, 129.45, 129.13, 128.47, 121.48, 61.72, 54.07, 29.62.

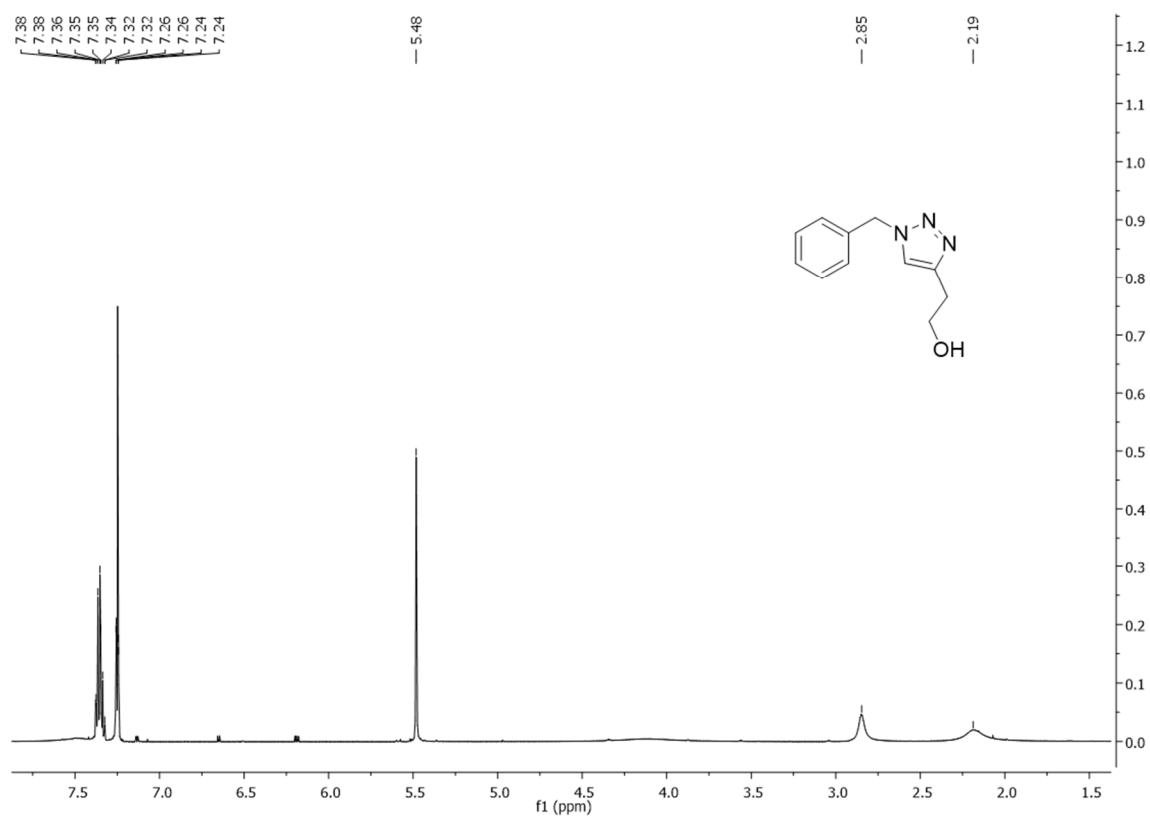

Figure S6. <sup>1</sup>H NMR of 3.

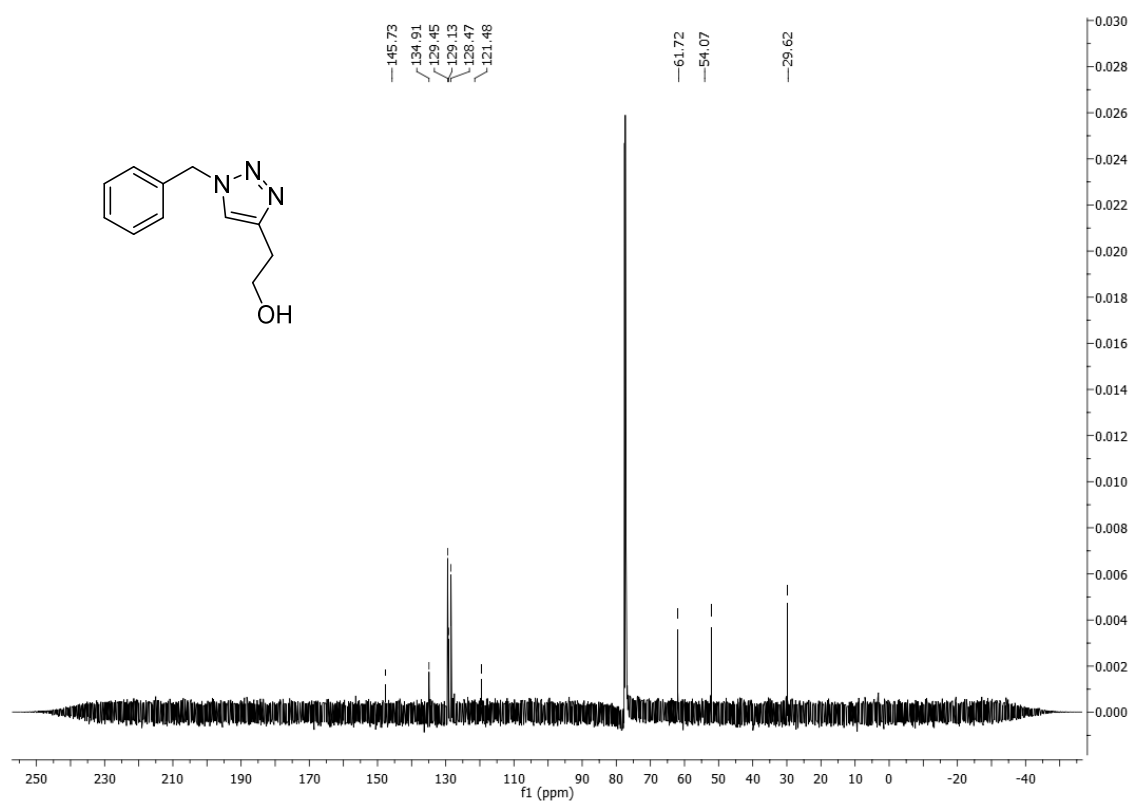

Figure S7. <sup>13</sup>C NMR of 3.

2-(1-undecyl-1H-1,2,3-triazol-4-yl)ethan-1-ol (4)



$^1\text{H}$  NMR (600 MHz,  $\text{CDCl}_3$ ):  $\delta$  4.32 (t,  $J = 6.8$  Hz, 1H), 4.11 (q,  $J = 7.1$  Hz, 2H), 2.95 – 2.79 (m, 2H), 1.91 – 1.85 (m, 2H), 1.29 (d,  $J = 11.7$  Hz, 4H), 1.27 – 1.26 (m, 2H), 1.25 – 1.23 (m, 10H), 0.87 (t,  $J = 7.1$  Hz, 3H).

$^{13}\text{C}$  NMR (151 MHz,  $\text{CDCl}_3$ ):  $\delta$  142.20, 132.09, 60.73, 32.20, 30.55, 29.85, 29.65, 29.32, 26.88, 22.99, 21.37, 14.47.

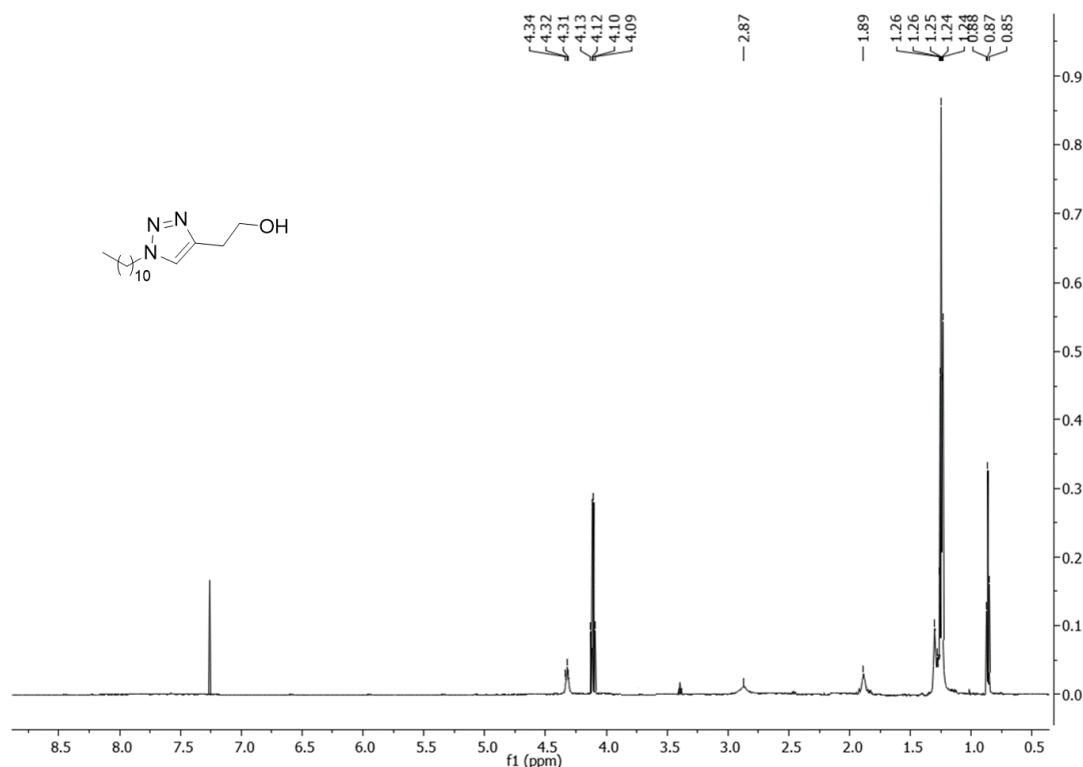

Figure S8.  $^1\text{H}$  NMR of 4.

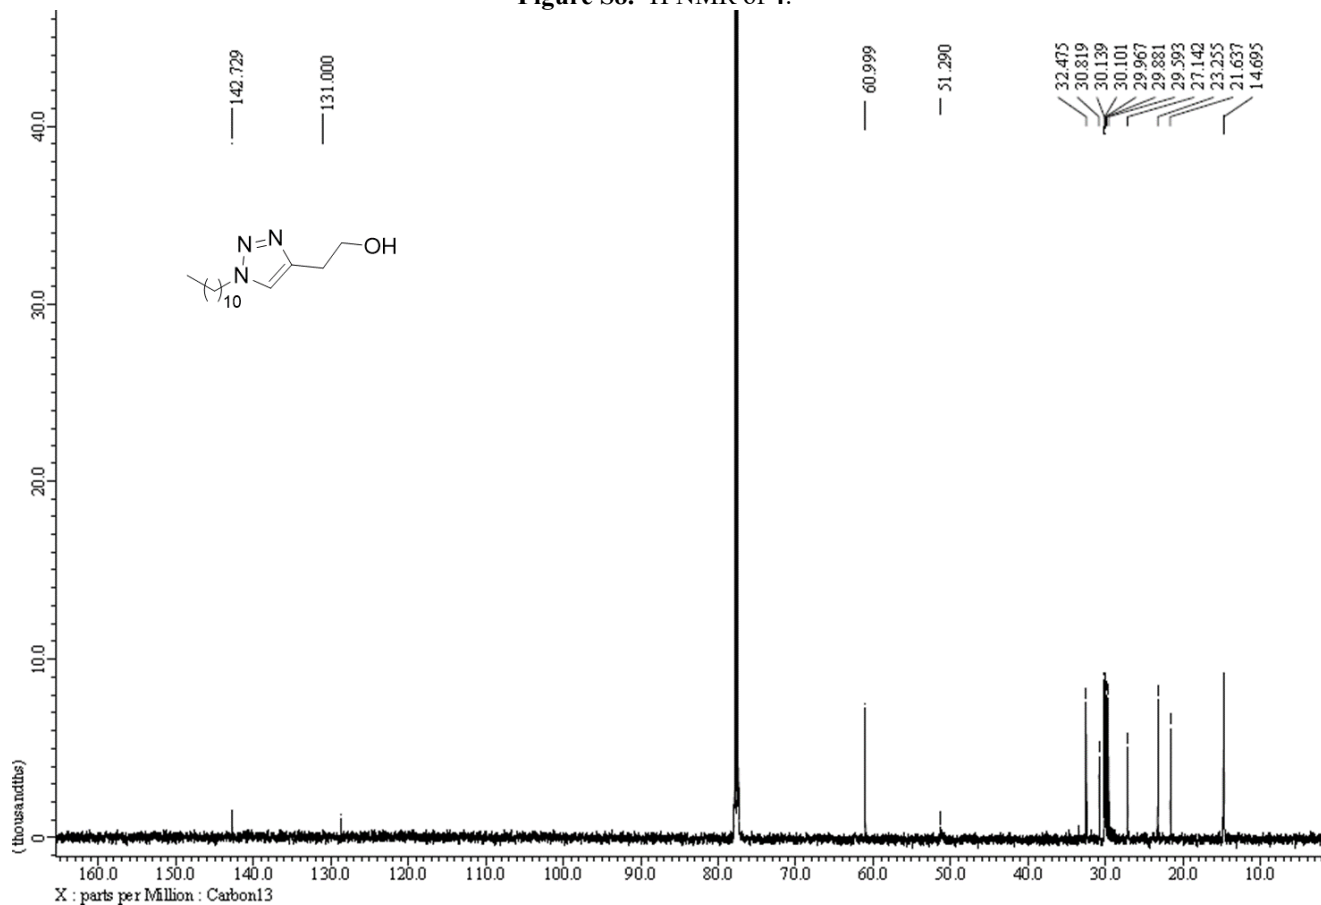

Figure S9.  $^{13}\text{C}$  NMR of 4.

c1ccccc1C2=CN(N2)N(CCC)CC

Chemical structure: \*c1cc(ccc1)-c2nn[nH]2 (Poly(10-phenyl-10H-1,2,4-triazole))

<sup>1</sup>H NMR spectrum (CDCl<sub>3</sub>) showing peaks for the compound. The x-axis represents the chemical shift in ppm (f1), ranging from 10.0 to 0.5. The y-axis represents the intensity, ranging from 0.00 to 0.55.

Peak assignments and integration values:

- 7.83, 7.83, 7.82, 7.82, 7.73, 7.43, 7.42, 7.34, 7.33, 7.33, 7.32, 7.31 (Aromatic protons)
- 4.40, 4.38, 4.37 (Methoxy protons)
- 1.95, 1.94, 1.92 (Methylene protons)
- 1.33, 1.26, 1.24, 0.87, 0.86, 0.85 (Methylene protons)

<sup>13</sup>C NMR (151 MHz, CDCl<sub>3</sub>): δ 130.92, 129.19, 128.51, 126.08, 119.79, 50.87, 32.22, 30.68, 29.77, 29.35, 26.84, 23.01, 14.44.

**Figure S10.**  $^1\text{H}$  NMR of **5**.

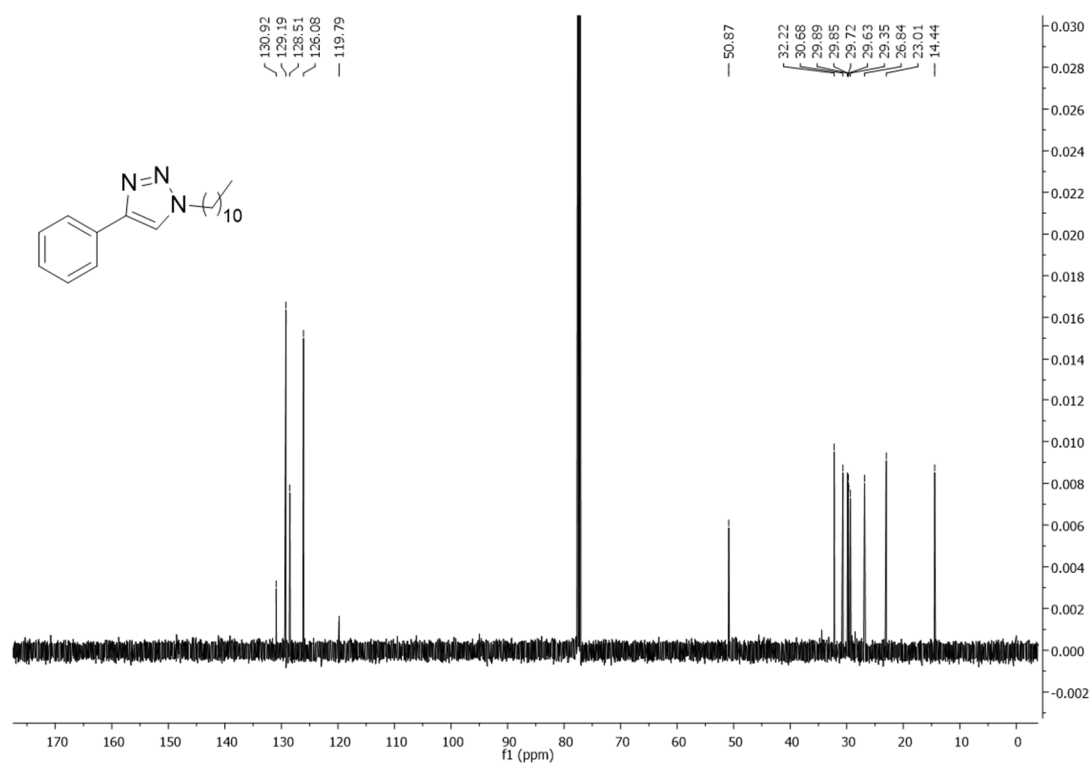

Figure S11. <sup>13</sup>C NMR of 5.

#### 4. References

1. Trotta, F.; Martina, K.; Robaldo, B.; Barge, A.; Cravotto, G. Recent advances in the synthesis of cyclodextrin derivatives under microwaves and power ultrasound. *Journal of Inclusion Phenomena and Macrocyclic Chemistry* **2007**, *57*, 3-7, doi:10.1007/s10847-006-9169-z.
